# Supplementary material for: Non-Small-Cell Lung Cancer Immunotherapy and Sleep Characteristics: The Crossroad for Optimal Survival
Source: MDPI journal article supplement (doi:10.3390/diseases11010026), 2023-02-01
Supplement: s1 [file s1]

# Non-Small-Cell Lung Cancer Immunotherapy and Sleep Characteristics: The Cross-road for Optimal Survival

Paul Zarogoulidis <sup>1,2,\*</sup>, Dimitrios Petridis <sup>3</sup>, Christoforos Kosmidis <sup>2</sup>, Konstantinos Sapalidis <sup>2</sup>, Lila Nena <sup>4</sup>, Dimitris Matthaïos <sup>5</sup>, Vasilis Papadopoulos <sup>6</sup>, Eleni Isidora Perdikouri <sup>7</sup>, Konstantinos Porpodis <sup>8</sup>, Paschalis Kakavelas <sup>9</sup> and Paschalis Steiropoulos <sup>10</sup>

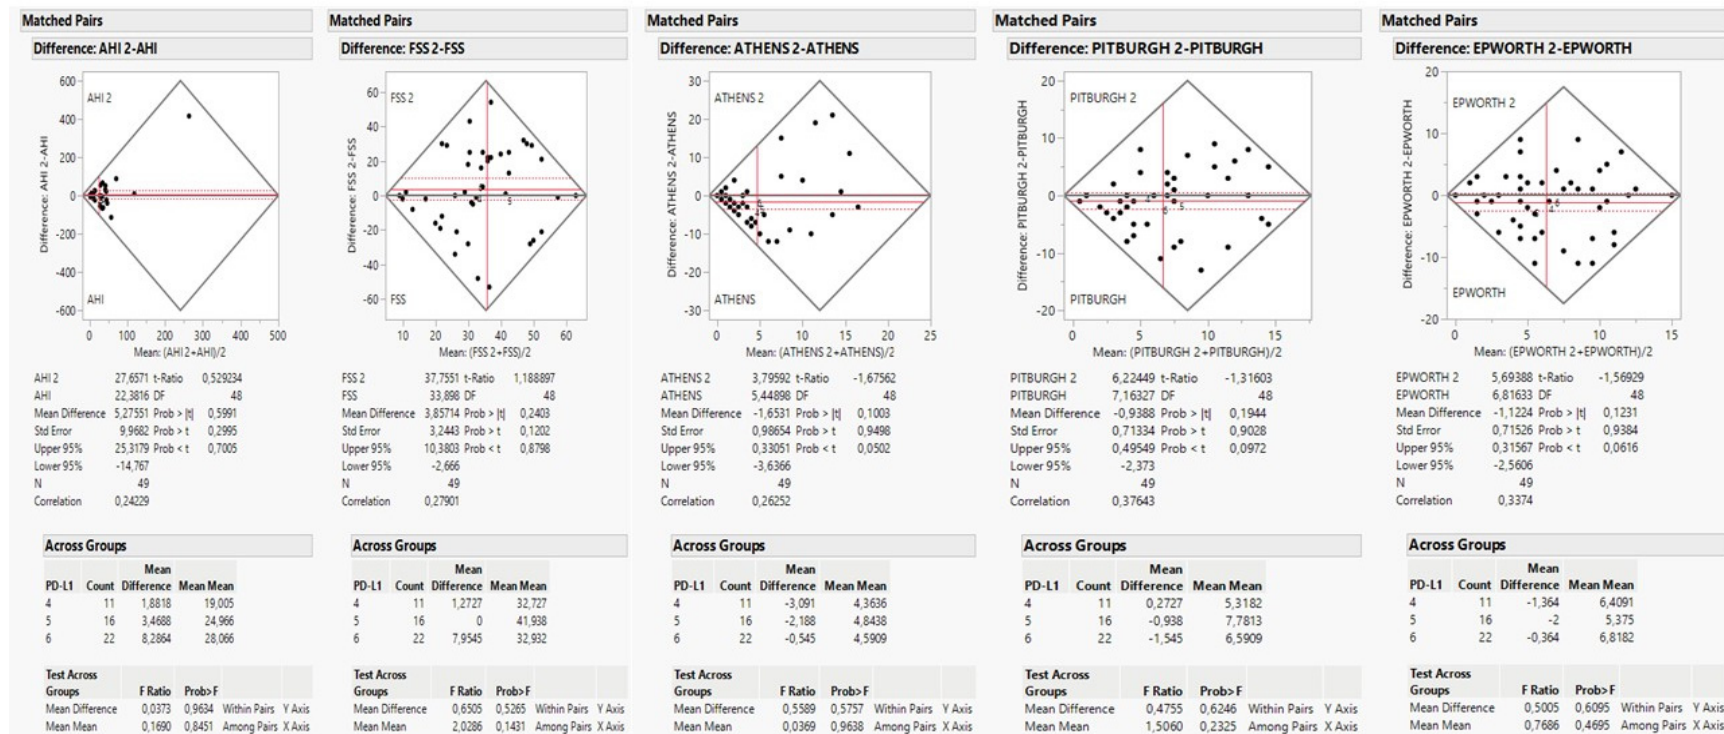

**Figure S1.** Turkey mean-difference plots, summary statistics and results of paired t-test of five questionnaire responses in accordance with PD-L1 test across groups. Horizontal and vertical lines determine the mean difference plus the 95% confidence intervals and the mean of paired sums accordingly.
